# Supplementary material
Source: PubMed Central journal article supplement (PMC6739123)

# Supplementary Figure S1

## A. *Ppt1*-mRNA

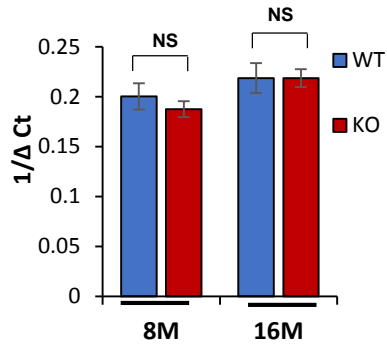

## B. *Ppt1*-Protein

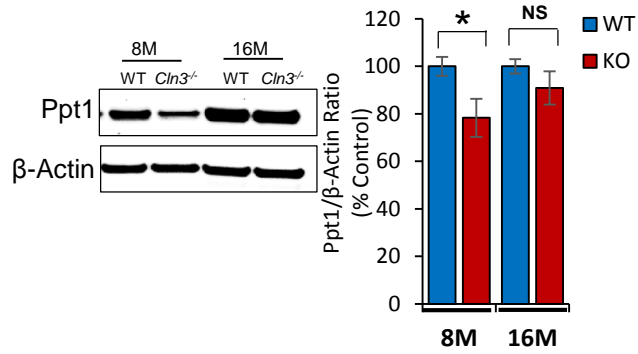

## C. *Ppt1*-Activity

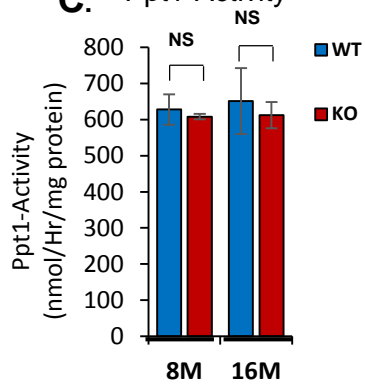

# Supplementary Figure S2

## A. Polyubiquitinated proteins

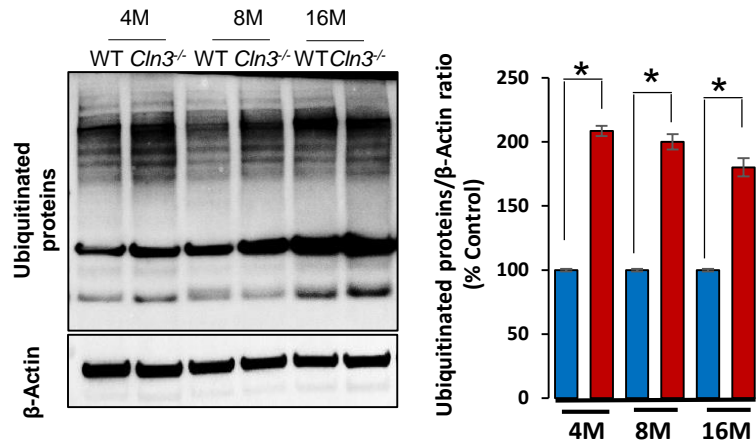

## B. Proteasome activity

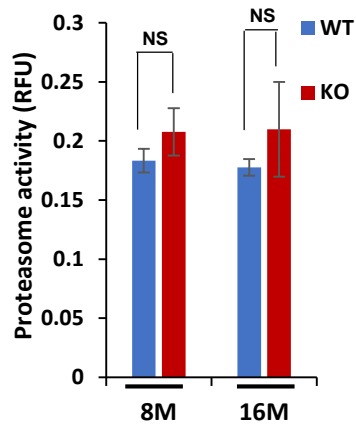

# Supplementary Figure S3

## A. $\beta$ -GBA-protein

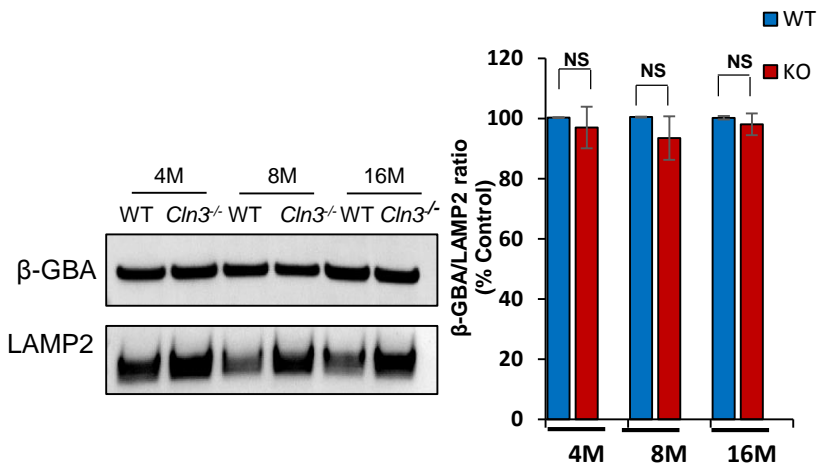

## B. Activity of $\beta$ -GBA

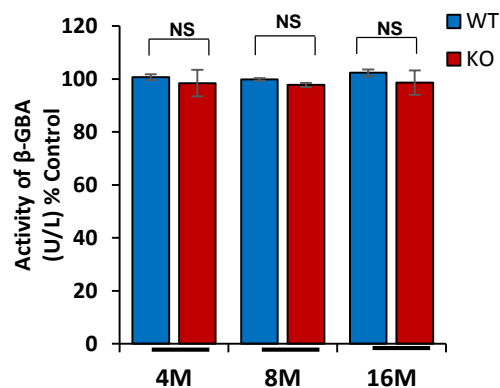

## C. Standard curve for lysosomal pH

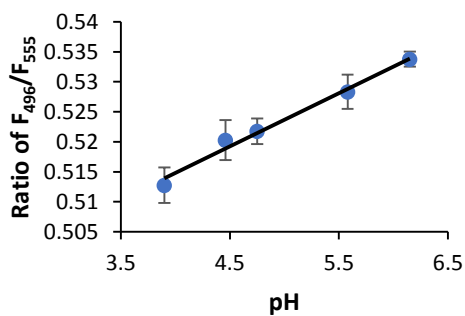

## D. Confirmation of co-localization of Oregon green and TMR Dextran

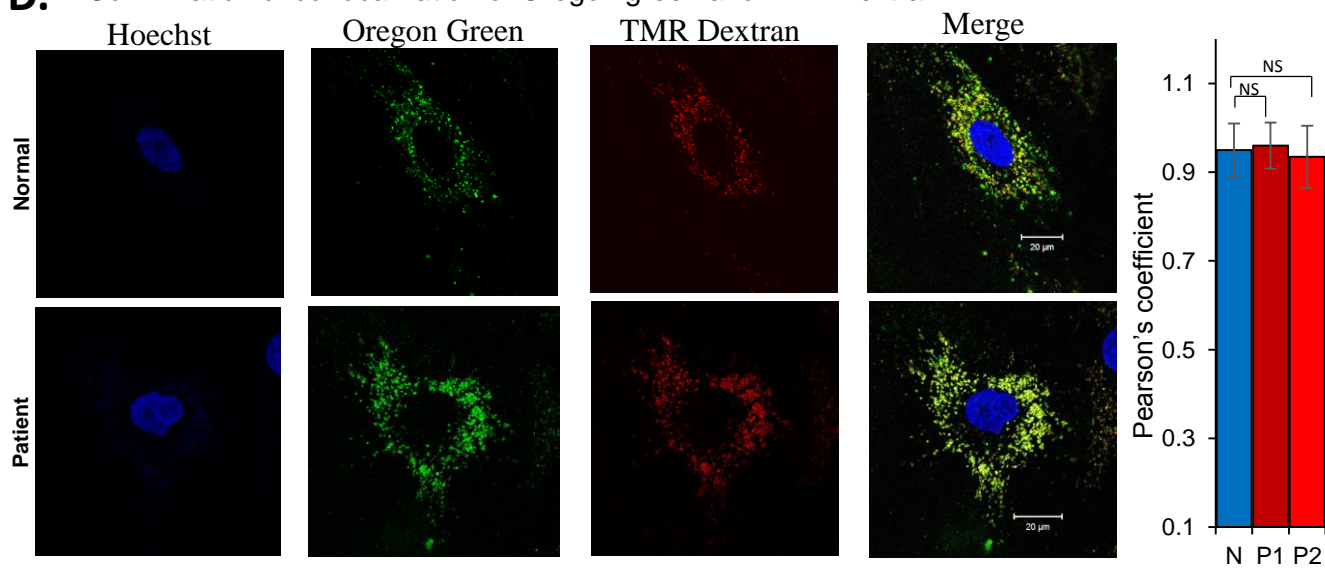

Supplement: NIHMS1027755-supplement-Supp_FigS1-3.pdf [file NIHMS1027755-supplement-Supp_FigS1-3.pdf]
